# Supplementary material
Source: publisher site journal article supplement (https://www.dovepress.com/article/259232)
Supplement: Supplementary file 1 [file get_supplementary_file.php]

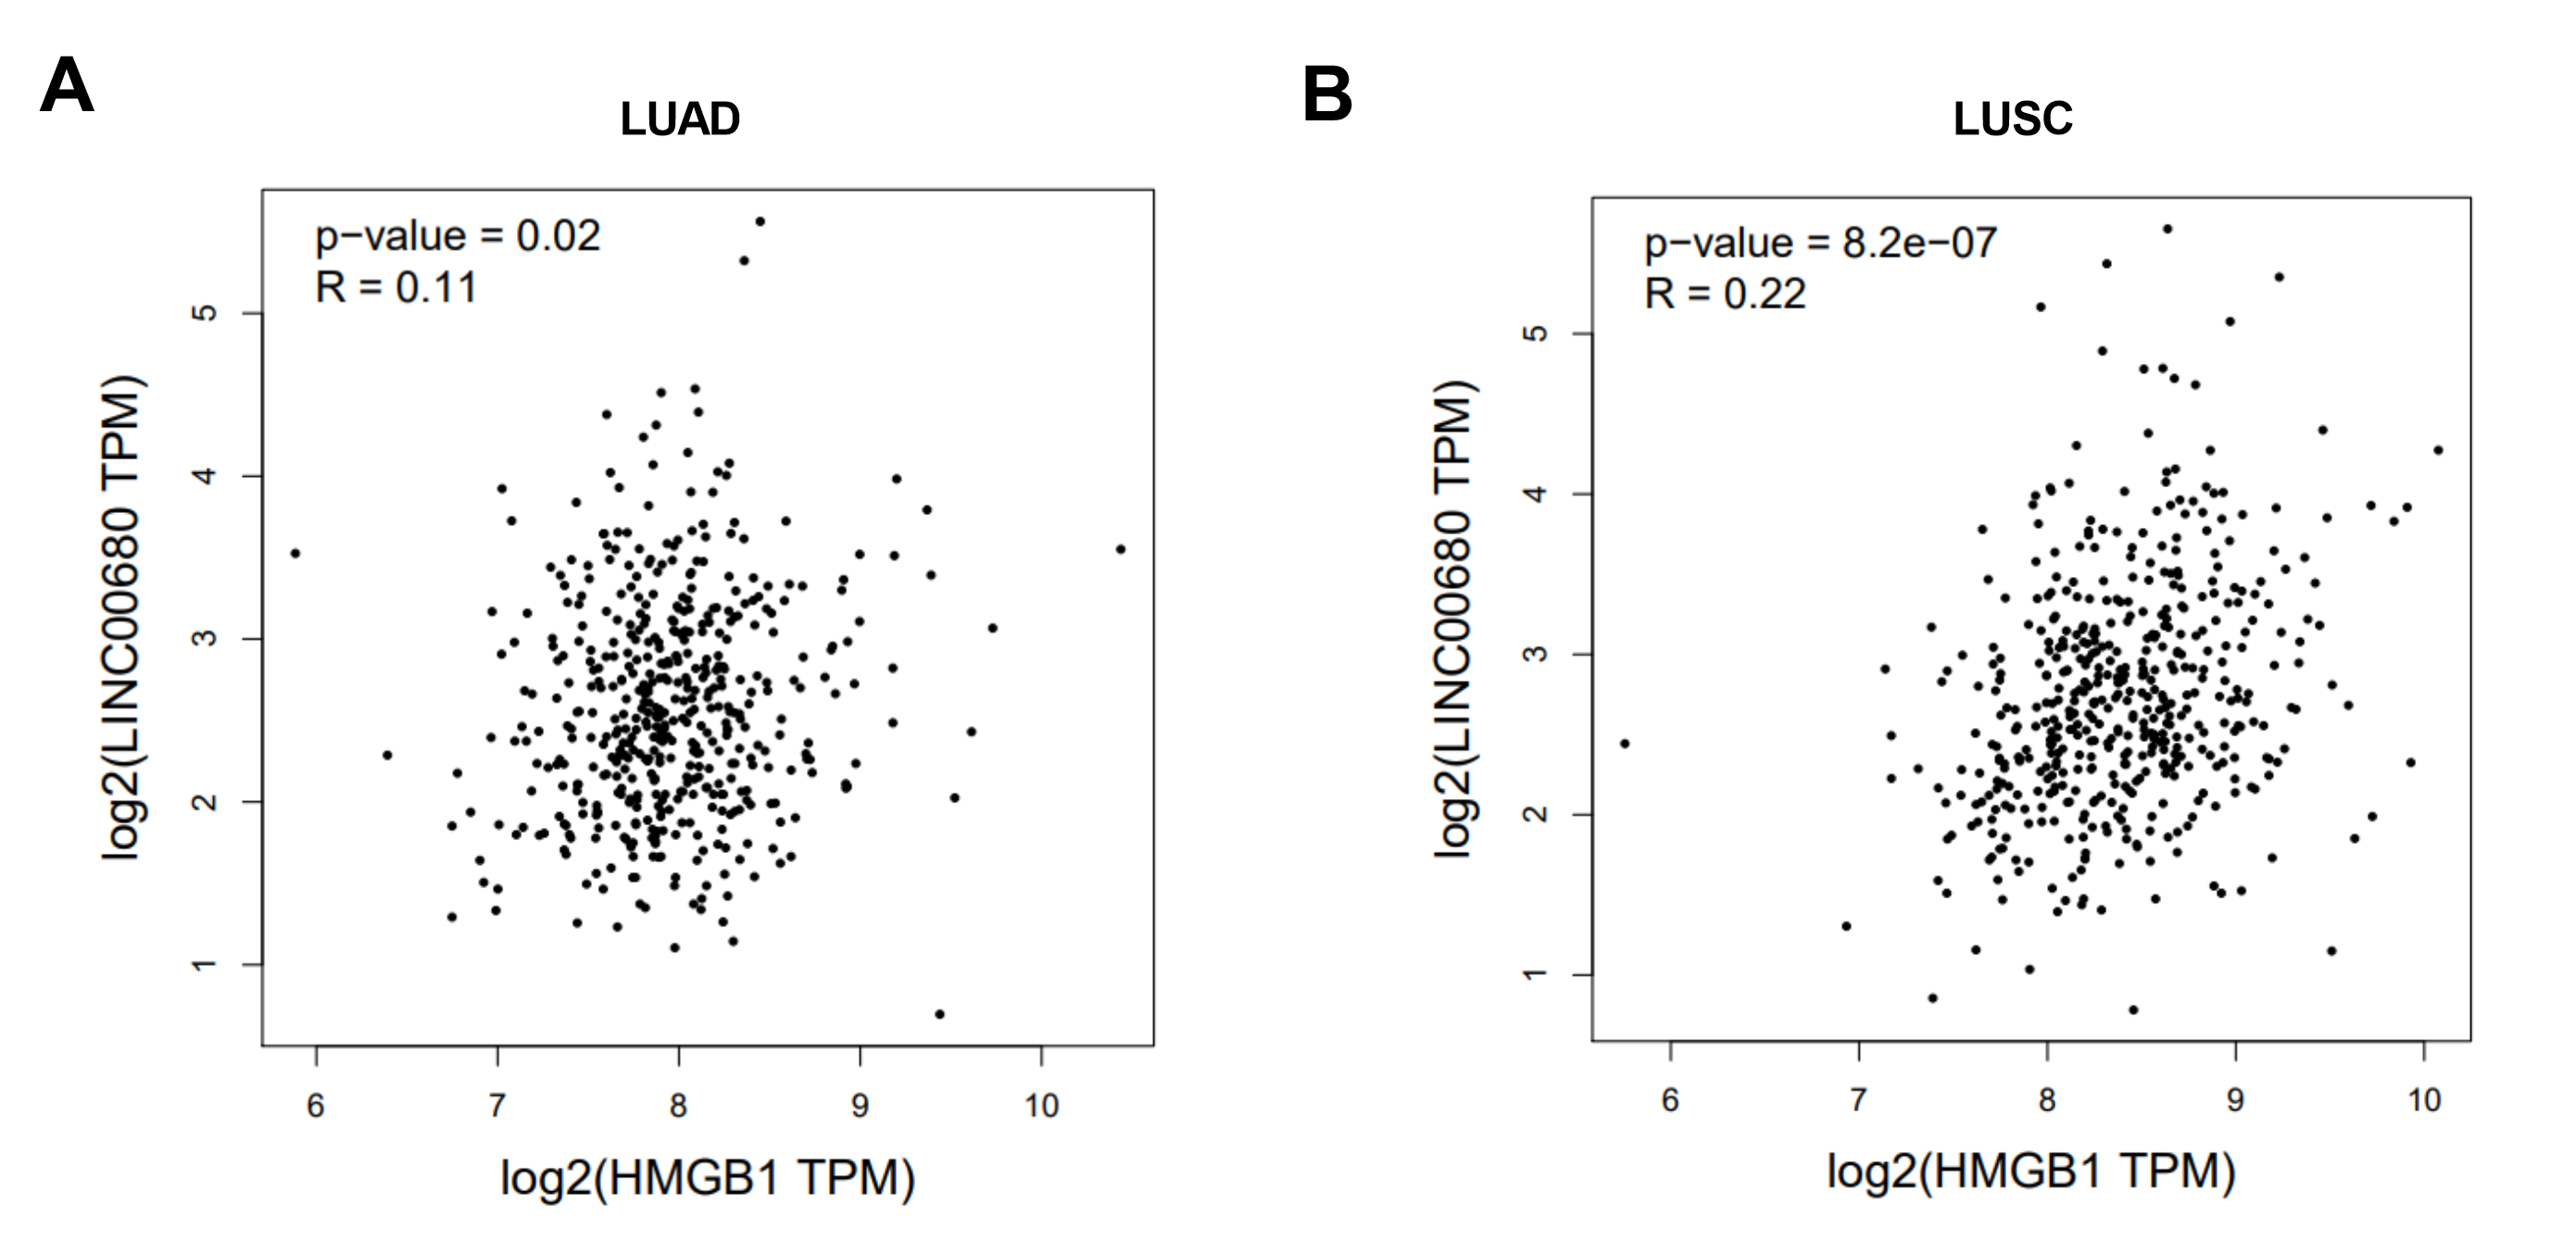


Supplement Figure Relationship between the expression of LINC00680 and HMGB1 in NSCLC.

A-B GEPIA database (http://gepia.cancer-pku.cn) was employed to analyze the relationship between the expression of LINC00680 and HMGB1 in LUAD (A) and LUSC (B).
